# Supplementary material
Source: publisher figshare collection journal article supplement (https://acs.figshare.com/ndownloader/files/4281996)
Supplement: Supplementary file 1 [file 4281996]

 
data_193 
 
_audit_creation_method            SHELXL-97 
_chemical_name_systematic 
; 
 ? 
; 
_chemical_name_common             ? 
_chemical_melting_point           ? 
_chemical_formula_moiety           
 'C32 H12 B F24, C5 H6 N, C5 H5 N'
_chemical_formula_sum 
 'C42 H23 B F24 N2' 
_chemical_formula_weight          1022.43 
 
loop_ 
 _atom_type_symbol 
 _atom_type_description 
 _atom_type_scat_dispersion_real 
 _atom_type_scat_dispersion_imag 
 _atom_type_scat_source 
 'C'  'C'   0.0033   0.0016 
 'International Tables Vol C Tables 4.2.6.8 and 6.1.1.4' 
 'H'  'H'   0.0000   0.0000 
 'International Tables Vol C Tables 4.2.6.8 and 6.1.1.4' 
 'N'  'N'   0.0061   0.0033 
 'International Tables Vol C Tables 4.2.6.8 and 6.1.1.4' 
 'F'  'F'   0.0171   0.0103 
 'International Tables Vol C Tables 4.2.6.8 and 6.1.1.4' 
 'B'  'B'   0.0013   0.0007 
 'International Tables Vol C Tables 4.2.6.8 and 6.1.1.4' 
 
_symmetry_cell_setting            monoclinic 
_symmetry_space_group_name_H-M    'P 21/n' 
_symmetry_space_group_name_Hall   '-P 2yn' 
 
loop_ 
 _symmetry_equiv_pos_as_xyz 
 'x, y, z' 
 '-x+1/2, y+1/2, -z+1/2' 
 '-x, -y, -z' 
 'x-1/2, -y-1/2, z-1/2' 
 
_cell_length_a                    13.1238(14) 
_cell_length_b                    18.615(3) 
_cell_length_c                    18.123(3) 
_cell_angle_alpha                 90.00 
_cell_angle_beta                  100.884(3) 
_cell_angle_gamma                 90.00 
_cell_volume                      4347.7(11) 
_cell_formula_units_Z             4 
_cell_measurement_temperature     100(2)                                
_cell_measurement_reflns_used     1067                                  
_cell_measurement_theta_min       2                                     
_cell_measurement_theta_max       25                                    
                                                                        
_exptl_crystal_description        prism                                 
_exptl_crystal_colour             colorless                             
_exptl_crystal_size_max           0.4                                   
_exptl_crystal_size_mid           0.26                                  
_exptl_crystal_size_min           0.24                                  
_exptl_crystal_density_meas       ?                                     
_exptl_crystal_density_diffrn     1.562                                 
_exptl_crystal_density_method     'not measured'                        
_exptl_crystal_F_000              2040                                  
_exptl_absorpt_coefficient_mu     0.164                                 
_exptl_absorpt_correction_type    'multi-scan'                          
_exptl_absorpt_correction_T_min   0.954                                 
_exptl_absorpt_correction_T_max   0.965                                 
_exptl_absorpt_process_details    'APEX2 (Bruker, 2005)'                
                                                                        
_exptl_special_details                                                  
;                                                                       
 ?                                                                      
;                                                                       
                                                                        
_diffrn_ambient_temperature       100(2)                                
_diffrn_radiation_wavelength      0.71073                               
_diffrn_radiation_type            MoK\a                                 
_diffrn_radiation_source          'fine-focus sealed tube'               
_diffrn_radiation_monochromator   graphite                              
_diffrn_measurement_device_type   'Bruker SMART APEX2 CCD area detector' 
_diffrn_measurement_method        'phi and omega scans'                  
_diffrn_detector_area_resol_mean  ? 
_diffrn_standards_number          ? 
_diffrn_standards_interval_count  ? 
_diffrn_standards_interval_time   ? 
_diffrn_standards_decay_%         ? 
_diffrn_reflns_number             30578 
_diffrn_reflns_av_R_equivalents   0.0604 
_diffrn_reflns_av_sigmaI/netI     0.0758 
_diffrn_reflns_limit_h_min        -14 
_diffrn_reflns_limit_h_max        17 
_diffrn_reflns_limit_k_min        -24 
_diffrn_reflns_limit_k_max        24 
_diffrn_reflns_limit_l_min        -23 
_diffrn_reflns_limit_l_max        21 
_diffrn_reflns_theta_min          1.58 
_diffrn_reflns_theta_max          28.00 
_reflns_number_total              10477 
_reflns_number_gt                 4895 
_reflns_threshold_expression      'I>2/s(I)'                           
                                                                       
_computing_data_collection        'APEX2 (Bruker, 2005)'               
_computing_cell_refinement        'APEX2 (Bruker, 2005)'               
_computing_data_reduction         'APEX2 (Bruker, 2005)'               
_computing_structure_solution     'SHELXTL ver. 5.1 (Sheldrick, 1998b)' 
_computing_structure_refinement   'SHELXTL ver. 5.1 (Sheldrick, 1998b)' 
_computing_molecular_graphics     'SHELXTL ver. 5.1 (Sheldrick, 1998b)'
_computing_publication_material   'SHELXTL ver. 5.1 (Sheldrick, 1998b)'
 
_refine_special_details 
; 
 Refinement of F^2^ against ALL reflections.  The weighted R-factor wR and 
 goodness of fit S are based on F^2^, conventional R-factors R are based 
 on F, with F set to zero for negative F^2^. The threshold expression of 
 F^2^ > 2sigma(F^2^) is used only for calculating R-factors(gt) etc. and is 
 not relevant to the choice of reflections for refinement.  R-factors based 
 on F^2^ are statistically about twice as large as those based on F, and R- 
 factors based on ALL data will be even larger. 
; 
 
_refine_ls_structure_factor_coef  Fsqd  
_refine_ls_matrix_type            full 
_refine_ls_weighting_scheme       calc  
_refine_ls_weighting_details 
 'calc w=1/[\s^2^(Fo^2^)+(0.0100P)^2^+15.5000P] where P=(Fo^2^+2Fc^2^)/3' 
_atom_sites_solution_primary      direct 
_atom_sites_solution_secondary    difmap 
_atom_sites_solution_hydrogens    geom 
_refine_ls_hydrogen_treatment     mixed 
_refine_ls_extinction_method      none 
_refine_ls_extinction_coef        ? 
_refine_ls_number_reflns          10477 
_refine_ls_number_parameters      567 
_refine_ls_number_restraints      0 
_refine_ls_R_factor_all           0.2228 
_refine_ls_R_factor_gt            0.1339 
_refine_ls_wR_factor_ref          0.2662 
_refine_ls_wR_factor_gt           0.2342 
_refine_ls_goodness_of_fit_ref    1.345 
_refine_ls_restrained_S_all       1.345 
_refine_ls_shift/su_max           0.006 
_refine_ls_shift/su_mean          0.001 
 
loop_ 
 _atom_site_label 
 _atom_site_type_symbol 
 _atom_site_fract_x 
 _atom_site_fract_y 
 _atom_site_fract_z 
 _atom_site_U_iso_or_equiv 
 _atom_site_adp_type 
 _atom_site_occupancy 
 _atom_site_symmetry_multiplicity 
 _atom_site_calc_flag 
 _atom_site_refinement_flags 
 _atom_site_disorder_assembly 
 _atom_site_disorder_group 
N1 N 0.3226(5) 0.1569(3) 0.0952(3) 0.0560(15) Uani 1 1 d . . . 
H1N H 0.2999 0.0959 0.0668 0.067 Uiso 1 1 d R . . 
N2 N 0.2826(6) 0.0250(3) 0.0433(4) 0.0682(18) Uani 1 1 d . . . 
B1 B 0.2445(5) 0.1610(3) 0.6132(3) 0.0298(13) Uani 1 1 d . . . 
C1 C 0.2769(6) 0.2176(4) 0.0680(4) 0.0604(19) Uani 1 1 d . . . 
H1A H 0.2234 0.2165 0.0262 0.072 Uiso 1 1 calc R . . 
C2 C 0.3089(7) 0.2819(4) 0.1018(5) 0.073(2) Uani 1 1 d . . . 
H2A H 0.2784 0.3248 0.0827 0.088 Uiso 1 1 calc R . . 
C3 C 0.3862(7) 0.2817(4) 0.1638(5) 0.072(2) Uani 1 1 d . . . 
H3A H 0.4073 0.3248 0.1880 0.087 Uiso 1 1 calc R . . 
C4 C 0.4322(6) 0.2199(4) 0.1903(4) 0.064(2) Uani 1 1 d . . . 
H4A H 0.4860 0.2200 0.2319 0.077 Uiso 1 1 calc R . . 
C5 C 0.3985(6) 0.1570(4) 0.1552(5) 0.069(2) Uani 1 1 d . . . 
H5A H 0.4291 0.1138 0.1734 0.083 Uiso 1 1 calc R . . 
C6 C 0.2127(7) -0.0174(4) 0.0667(5) 0.074(2) Uani 1 1 d . . . 
H6B H 0.1679 0.0023 0.0954 0.088 Uiso 1 1 calc R . . 
C7 C 0.2055(7) -0.0889(4) 0.0494(5) 0.075(2) Uani 1 1 d . . . 
H7B H 0.1572 -0.1179 0.0666 0.090 Uiso 1 1 calc R . . 
C8 C 0.2714(8) -0.1172(4) 0.0060(5) 0.079(3) Uani 1 1 d . . . 
H8A H 0.2679 -0.1657 -0.0067 0.094 Uiso 1 1 calc R . . 
C9 C 0.3399(7) -0.0746(5) -0.0175(5) 0.081(3) Uani 1 1 d . . . 
H9A H 0.3846 -0.0933 -0.0467 0.097 Uiso 1 1 calc R . . 
C10 C 0.3452(7) -0.0033(4) 0.0010(5) 0.076(2) Uani 1 1 d . . . 
H10B H 0.3933 0.0259 -0.0161 0.092 Uiso 1 1 calc R . . 
C11 C 0.1933(4) 0.1797(3) 0.5256(3) 0.0322(12) Uani 1 1 d . . . 
C12 C 0.2534(4) 0.1795(3) 0.4690(3) 0.0351(13) Uani 1 1 d . . . 
H12A H 0.3207 0.1617 0.4804 0.042 Uiso 1 1 calc R . . 
C13 C 0.2159(5) 0.2049(3) 0.3968(3) 0.0384(13) Uani 1 1 d . . . 
C14 C 0.1157(5) 0.2311(3) 0.3776(3) 0.0410(14) Uani 1 1 d . . . 
H14A H 0.0904 0.2479 0.3293 0.049 Uiso 1 1 calc R . . 
C15 C 0.0541(4) 0.2319(3) 0.4311(3) 0.0356(13) Uani 1 1 d . . . 
C16 C 0.0928(4) 0.2067(3) 0.5039(3) 0.0340(12) Uani 1 1 d . . . 
H16A H 0.0497 0.2080 0.5391 0.041 Uiso 1 1 calc R . . 
C17 C 0.2883(3) 0.2049(2) 0.33832(17) 0.0552(18) Uani 1 1 d . . . 
F1 F 0.3805(3) 0.2298(4) 0.3699(2) 0.092(2) Uani 0.68 1 calc PR . . 
F2 F 0.2482(4) 0.2461(3) 0.2809(2) 0.091(3) Uani 0.68 1 calc PR . . 
F3 F 0.2980(4) 0.1387(2) 0.3144(3) 0.080(2) Uani 0.68 1 calc PR . . 
F1' F 0.2373(3) 0.1800(4) 0.27360(19) 0.092(2) Uani 0.32 1 calc PR . . 
F3' F 0.3696(3) 0.1636(3) 0.3625(2) 0.080(2) Uani 0.32 1 calc PR . . 
F2' F 0.3198(5) 0.2711(2) 0.3291(3) 0.091(3) Uani 0.32 1 calc PR . . 
C18 C -0.0527(5) 0.2607(4) 0.4127(4) 0.0534(17) Uani 1 1 d . . . 
F4 F -0.0657(3) 0.3189(3) 0.4537(3) 0.0925(16) Uani 1 1 d . . . 
F6 F -0.0840(3) 0.2787(3) 0.3427(2) 0.104(2) Uani 1 1 d . . . 
F5 F -0.1240(3) 0.2153(3) 0.4290(3) 0.0924(16) Uani 1 1 d . . . 
C19 C 0.1603(4) 0.1275(3) 0.6597(3) 0.0307(12) Uani 1 1 d . . . 
C20 C 0.0820(4) 0.0804(3) 0.6255(3) 0.0331(12) Uani 1 1 d . . . 
H20A H 0.0744 0.0719 0.5741 0.040 Uiso 1 1 calc R . . 
C21 C 0.0153(4) 0.0458(3) 0.6651(3) 0.0373(13) Uani 1 1 d . . . 
C22 C 0.0233(4) 0.0581(3) 0.7412(3) 0.0383(13) Uani 1 1 d . . . 
H22A H -0.0225 0.0362 0.7676 0.046 Uiso 1 1 calc R . . 
C23 C 0.1002(5) 0.1035(3) 0.7774(3) 0.0384(13) Uani 1 1 d . . . 
C24 C 0.1678(4) 0.1364(3) 0.7374(3) 0.0336(12) Uani 1 1 d . . . 
H24A H 0.2201 0.1656 0.7632 0.040 Uiso 1 1 calc R . . 
C25 C -0.0688(3) -0.0060(2) 0.6231(2) 0.0564(18) Uani 1 1 d . . . 
F7 F -0.0278(4) -0.0701(3) 0.6181(7) 0.134(4) Uani 0.62 1 calc PR . . 
F8 F -0.1045(6) 0.0191(4) 0.5550(3) 0.088(2) Uani 0.62 1 calc PR . . 
F9 F -0.1457(6) -0.0109(5) 0.6604(4) 0.113(3) Uani 0.62 1 calc PR . . 
F7' F -0.1576(3) 0.0289(3) 0.6042(6) 0.134(4) Uani 0.38 1 calc PR . . 
F8' F -0.0809(8) -0.0604(4) 0.6674(3) 0.088(2) Uani 0.38 1 calc PR . . 
F9' F -0.0396(5) -0.0304(5) 0.5619(4) 0.113(3) Uani 0.38 1 calc PR . . 
C26 C 0.1100(3) 0.1188(2) 0.86313(15) 0.0584(18) Uani 1 1 d . . . 
F10 F 0.0699(6) 0.0648(3) 0.89516(17) 0.103(3) Uani 0.68 1 calc PR . . 
F11 F 0.0595(6) 0.1785(4) 0.87252(15) 0.120(3) Uani 0.68 1 calc PR . . 
F12 F 0.2088(3) 0.1262(4) 0.89421(17) 0.0765(18) Uani 0.68 1 calc PR . . 
F10' F 0.1556(7) 0.1815(3) 0.87944(16) 0.103(3) Uani 0.32 1 calc PR . . 
F11' F 0.1659(6) 0.0678(3) 0.90207(15) 0.120(3) Uani 0.32 1 calc PR . . 
F12' F 0.0167(3) 0.1201(5) 0.88038(17) 0.0765(18) Uani 0.32 1 calc PR . . 
C27 C 0.2899(4) 0.2393(3) 0.6462(3) 0.0340(12) Uani 1 1 d . . . 
C28 C 0.3858(4) 0.2642(3) 0.6311(3) 0.0386(13) Uani 1 1 d . . . 
H28A H 0.4247 0.2344 0.6060 0.046 Uiso 1 1 calc R . . 
C29 C 0.4234(5) 0.3324(3) 0.6532(4) 0.0451(15) Uani 1 1 d . . . 
C30 C 0.3672(5) 0.3784(3) 0.6903(4) 0.0511(17) Uani 1 1 d . . . 
H30A H 0.3929 0.4237 0.7057 0.061 Uiso 1 1 calc R . . 
C31 C 0.2725(5) 0.3560(3) 0.7039(3) 0.0436(15) Uani 1 1 d . . . 
C32 C 0.2356(4) 0.2877(3) 0.6812(3) 0.0375(13) Uani 1 1 d . . . 
H32A H 0.1708 0.2741 0.6901 0.045 Uiso 1 1 calc R . . 
C33 C 0.5304(3) 0.3560(2) 0.6346(3) 0.082(3) Uani 1 1 d . . . 
F13 F 0.5187(3) 0.3715(6) 0.5625(3) 0.138(4) Uani 0.64 1 calc PR . . 
F14 F 0.5978(4) 0.3030(3) 0.6510(6) 0.107(3) Uani 0.64 1 calc PR . . 
F15 F 0.5648(5) 0.4131(4) 0.6748(5) 0.107(3) Uani 0.64 1 calc PR . . 
F13' F 0.6022(3) 0.3536(6) 0.6964(3) 0.138(4) Uani 0.36 1 calc PR . . 
F14' F 0.5231(3) 0.4221(3) 0.6079(6) 0.107(3) Uani 0.36 1 calc PR . . 
F15' F 0.5561(5) 0.3120(5) 0.5840(5) 0.107(3) Uani 0.36 1 calc PR . . 
C34 C 0.2064(3) 0.4070(2) 0.7445(3) 0.069(2) Uani 1 1 d . . . 
F16 F 0.2686(3) 0.4489(4) 0.7916(5) 0.105(3) Uani 0.63 1 calc PR . . 
F17 F 0.1490(5) 0.3683(2) 0.7820(5) 0.083(2) Uani 0.63 1 calc PR . . 
F18 F 0.1456(7) 0.4468(4) 0.6942(3) 0.146(4) Uani 0.63 1 calc PR . . 
F16' F 0.1069(3) 0.3938(4) 0.7203(4) 0.105(3) Uani 0.37 1 calc PR . . 
F17' F 0.2265(7) 0.4744(2) 0.7299(6) 0.083(2) Uani 0.37 1 calc PR . . 
F18' F 0.2299(5) 0.3959(4) 0.8177(3) 0.146(4) Uani 0.37 1 calc PR . . 
C35 C 0.3356(4) 0.0997(3) 0.6209(3) 0.0322(12) Uani 1 1 d . . . 
C36 C 0.3283(4) 0.0400(3) 0.5735(3) 0.0362(13) Uani 1 1 d . . . 
H36A H 0.2717 0.0363 0.5341 0.043 Uiso 1 1 calc R . . 
C38 C 0.4884(5) -0.0103(3) 0.6402(3) 0.0430(14) Uani 1 1 d . . . 
H38A H 0.5387 -0.0461 0.6462 0.052 Uiso 1 1 calc R . . 
C37 C 0.4025(4) -0.0141(3) 0.5830(3) 0.0383(13) Uani 1 1 d . . . 
C39 C 0.4978(5) 0.0483(3) 0.6887(3) 0.0427(14) Uani 1 1 d . . . 
C40 C 0.4232(5) 0.1014(3) 0.6786(3) 0.0410(14) Uani 1 1 d . . . 
H40A H 0.4315 0.1401 0.7116 0.049 Uiso 1 1 calc R . . 
C41 C 0.3882(3) -0.07973(15) 0.52771(17) 0.0547(18) Uani 1 1 d . . . 
F19 F 0.3528(3) -0.05696(15) 0.45865(17) 0.0578(13) Uani 0.74 1 calc PR . . 
F20 F 0.3214(3) -0.12546(15) 0.54762(17) 0.094(2) Uani 0.74 1 calc PR . . 
F21 F 0.4783(3) -0.11203(15) 0.53036(17) 0.097(2) Uani 0.74 1 calc PR . . 
F19' F 0.4156(3) -0.13934(15) 0.56577(17) 0.0578(13) Uani 0.26 1 calc PR . . 
F20' F 0.4469(3) -0.07083(15) 0.47679(17) 0.094(2) Uani 0.26 1 calc PR . . 
F21' F 0.2900(3) -0.08427(15) 0.49406(17) 0.097(2) Uani 0.26 1 calc PR . . 
C42 C 0.5927(3) 0.0547(2) 0.7546(2) 0.075(2) Uani 1 1 d . . . 
F22 F 0.5597(3) 0.0572(5) 0.8191(2) 0.128(4) Uani 0.70 1 calc PR . . 
F23 F 0.6448(5) 0.1139(3) 0.7464(3) 0.114(3) Uani 0.70 1 calc PR . . 
F24 F 0.6538(3) -0.0016(2) 0.7543(3) 0.0756(19) Uani 0.70 1 calc PR . . 
F22' F 0.6792(3) 0.0558(4) 0.7275(2) 0.128(4) Uani 0.30 1 calc PR . . 
F23' F 0.5940(4) -0.0008(3) 0.8001(3) 0.114(3) Uani 0.30 1 calc PR . . 
F24' F 0.5851(4) 0.1146(3) 0.7922(4) 0.0756(19) Uani 0.30 1 calc PR . . 
 
loop_ 
 _atom_site_aniso_label 
 _atom_site_aniso_U_11 
 _atom_site_aniso_U_22 
 _atom_site_aniso_U_33 
 _atom_site_aniso_U_23 
 _atom_site_aniso_U_13 
 _atom_site_aniso_U_12 
N1 0.063(4) 0.046(3) 0.063(4) -0.012(3) 0.023(3) -0.002(3) 
N2 0.089(5) 0.045(4) 0.064(4) -0.014(3) -0.002(4) 0.012(3) 
B1 0.031(3) 0.027(3) 0.030(3) -0.001(2) 0.002(2) 0.001(2) 
C1 0.068(5) 0.065(5) 0.049(4) -0.005(4) 0.011(3) -0.003(4) 
C2 0.108(7) 0.041(4) 0.070(5) 0.011(4) 0.016(5) 0.003(4) 
C3 0.104(7) 0.050(5) 0.067(5) -0.011(4) 0.022(5) -0.034(5) 
C4 0.060(5) 0.074(5) 0.060(5) -0.005(4) 0.016(4) -0.011(4) 
C5 0.080(6) 0.061(5) 0.071(5) 0.001(4) 0.027(5) 0.015(4) 
C6 0.085(6) 0.060(5) 0.075(6) -0.004(4) 0.010(5) 0.018(5) 
C7 0.075(6) 0.057(5) 0.087(6) 0.006(5) 0.002(5) -0.001(4) 
C8 0.102(7) 0.045(4) 0.078(6) -0.023(4) -0.010(5) 0.006(5) 
C9 0.084(6) 0.075(6) 0.081(6) -0.023(5) 0.012(5) 0.018(5) 
C10 0.086(6) 0.059(5) 0.081(6) -0.017(5) 0.009(5) -0.004(4) 
C11 0.036(3) 0.025(3) 0.037(3) 0.001(2) 0.009(2) -0.001(2) 
C12 0.033(3) 0.032(3) 0.039(3) 0.003(2) 0.006(2) 0.000(2) 
C13 0.047(4) 0.037(3) 0.034(3) 0.004(3) 0.016(3) 0.004(3) 
C14 0.050(4) 0.039(3) 0.034(3) 0.007(3) 0.009(3) 0.006(3) 
C15 0.034(3) 0.033(3) 0.041(3) 0.000(3) 0.008(2) -0.001(2) 
C16 0.038(3) 0.028(3) 0.038(3) 0.000(2) 0.012(2) 0.000(2) 
C17 0.071(5) 0.057(4) 0.041(4) 0.013(3) 0.019(3) 0.015(4) 
F1 0.064(4) 0.161(7) 0.059(4) -0.012(4) 0.031(3) -0.047(4) 
F2 0.103(6) 0.119(6) 0.067(4) 0.062(4) 0.056(4) 0.058(5) 
F3 0.099(5) 0.080(4) 0.075(4) -0.005(3) 0.052(4) 0.029(4) 
F1' 0.064(4) 0.161(7) 0.059(4) -0.012(4) 0.031(3) -0.047(4) 
F3' 0.099(5) 0.080(4) 0.075(4) -0.005(3) 0.052(4) 0.029(4) 
F2' 0.103(6) 0.119(6) 0.067(4) 0.062(4) 0.056(4) 0.058(5) 
C18 0.043(4) 0.066(5) 0.050(4) 0.014(4) 0.008(3) 0.013(3) 
F4 0.066(3) 0.089(4) 0.118(4) -0.019(3) 0.008(3) 0.039(3) 
F6 0.065(3) 0.190(6) 0.056(3) 0.043(3) 0.008(2) 0.053(3) 
F5 0.040(2) 0.112(4) 0.124(4) 0.036(3) 0.015(2) 0.002(3) 
C19 0.036(3) 0.025(3) 0.031(3) 0.002(2) 0.004(2) 0.003(2) 
C20 0.040(3) 0.028(3) 0.031(3) -0.004(2) 0.008(2) 0.000(2) 
C21 0.037(3) 0.030(3) 0.045(3) 0.004(3) 0.007(3) 0.002(2) 
C22 0.037(3) 0.032(3) 0.048(4) 0.012(3) 0.011(3) 0.004(2) 
C23 0.045(3) 0.037(3) 0.033(3) 0.005(3) 0.008(3) 0.006(3) 
C24 0.035(3) 0.034(3) 0.032(3) -0.002(2) 0.003(2) -0.001(2) 
C25 0.062(5) 0.048(4) 0.062(5) 0.010(4) 0.017(4) -0.005(3) 
F7 0.081(5) 0.054(5) 0.246(12) -0.050(6) -0.021(7) -0.011(4) 
F8 0.073(5) 0.114(6) 0.074(5) -0.006(4) 0.005(4) -0.044(4) 
F9 0.090(6) 0.159(9) 0.101(6) -0.052(6) 0.053(5) -0.085(6) 
F7' 0.081(5) 0.054(5) 0.246(12) -0.050(6) -0.021(7) -0.011(4) 
F8' 0.073(5) 0.114(6) 0.074(5) -0.006(4) 0.005(4) -0.044(4) 
F9' 0.090(6) 0.159(9) 0.101(6) -0.052(6) 0.053(5) -0.085(6) 
C26 0.048(4) 0.073(5) 0.054(4) 0.006(4) 0.010(3) -0.006(4) 
F10 0.139(6) 0.131(7) 0.042(3) 0.013(4) 0.026(4) -0.069(6) 
F11 0.180(8) 0.125(7) 0.061(4) -0.010(4) 0.033(5) 0.076(6) 
F12 0.073(4) 0.116(5) 0.036(3) 0.003(3) 0.000(3) -0.016(4) 
F10' 0.139(6) 0.131(7) 0.042(3) 0.013(4) 0.026(4) -0.069(6) 
F11' 0.180(8) 0.125(7) 0.061(4) -0.010(4) 0.033(5) 0.076(6) 
F12' 0.073(4) 0.116(5) 0.036(3) 0.003(3) 0.000(3) -0.016(4) 
C27 0.040(3) 0.032(3) 0.030(3) -0.001(2) 0.009(2) -0.001(2) 
C28 0.040(3) 0.036(3) 0.043(3) -0.004(3) 0.015(3) -0.002(3) 
C29 0.041(4) 0.043(4) 0.054(4) -0.005(3) 0.015(3) -0.013(3) 
C30 0.059(4) 0.036(3) 0.061(4) -0.012(3) 0.017(3) -0.013(3) 
C31 0.053(4) 0.031(3) 0.049(4) -0.011(3) 0.016(3) -0.004(3) 
C32 0.038(3) 0.033(3) 0.043(3) -0.004(3) 0.011(3) -0.004(2) 
C33 0.079(6) 0.038(4) 0.131(8) -0.016(5) 0.029(6) -0.013(4) 
F13 0.074(5) 0.268(13) 0.070(5) 0.033(7) 0.008(4) -0.084(7) 
F14 0.068(5) 0.118(7) 0.141(8) -0.033(6) 0.034(5) -0.020(4) 
F15 0.089(5) 0.105(6) 0.141(8) -0.061(5) 0.059(5) -0.067(5) 
F13' 0.074(5) 0.268(13) 0.070(5) 0.033(7) 0.008(4) -0.084(7) 
F14' 0.068(5) 0.118(7) 0.141(8) -0.033(6) 0.034(5) -0.020(4) 
F15' 0.089(5) 0.105(6) 0.141(8) -0.061(5) 0.059(5) -0.067(5) 
C34 0.096(6) 0.045(4) 0.076(5) -0.015(4) 0.042(5) -0.015(4) 
F16 0.077(5) 0.106(6) 0.140(8) -0.097(6) 0.040(5) -0.028(4) 
F17 0.069(4) 0.076(4) 0.115(6) -0.058(4) 0.042(4) -0.026(4) 
F18 0.212(12) 0.124(7) 0.111(7) 0.004(7) 0.053(8) 0.104(8) 
F16' 0.077(5) 0.106(6) 0.140(8) -0.097(6) 0.040(5) -0.028(4) 
F17' 0.069(4) 0.076(4) 0.115(6) -0.058(4) 0.042(4) -0.026(4) 
F18' 0.212(12) 0.124(7) 0.111(7) 0.004(7) 0.053(8) 0.104(8) 
C35 0.035(3) 0.028(3) 0.034(3) 0.002(2) 0.006(2) -0.001(2) 
C36 0.039(3) 0.033(3) 0.036(3) -0.002(2) 0.003(2) -0.002(2) 
C38 0.041(3) 0.037(3) 0.050(4) 0.007(3) 0.006(3) 0.010(3) 
C37 0.039(3) 0.031(3) 0.044(3) -0.001(3) 0.006(3) -0.001(2) 
C39 0.043(4) 0.039(3) 0.043(3) 0.000(3) -0.001(3) 0.002(3) 
C40 0.048(4) 0.035(3) 0.038(3) -0.001(3) 0.004(3) -0.001(3) 
C41 0.055(4) 0.042(4) 0.065(5) -0.004(3) 0.005(3) 0.017(3) 
F19 0.072(3) 0.060(3) 0.043(3) -0.015(2) 0.014(2) -0.002(3) 
F20 0.152(6) 0.061(4) 0.081(4) -0.030(3) 0.052(4) -0.063(4) 
F21 0.082(4) 0.083(4) 0.116(5) -0.049(4) -0.012(4) 0.041(4) 
F19' 0.072(3) 0.060(3) 0.043(3) -0.015(2) 0.014(2) -0.002(3) 
F20' 0.152(6) 0.061(4) 0.081(4) -0.030(3) 0.052(4) -0.063(4) 
F21' 0.082(4) 0.083(4) 0.116(5) -0.049(4) -0.012(4) 0.041(4) 
C42 0.062(5) 0.060(5) 0.094(6) -0.008(5) -0.009(4) 0.030(4) 
F22 0.123(6) 0.184(9) 0.059(4) -0.037(5) -0.029(4) 0.080(6) 
F23 0.080(5) 0.069(5) 0.161(7) 0.017(5) -0.060(5) -0.021(4) 
F24 0.061(4) 0.061(4) 0.089(4) -0.006(3) -0.026(3) 0.034(3) 
F22' 0.123(6) 0.184(9) 0.059(4) -0.037(5) -0.029(4) 0.080(6) 
F23' 0.080(5) 0.069(5) 0.161(7) 0.017(5) -0.060(5) -0.021(4) 
F24' 0.061(4) 0.061(4) 0.089(4) -0.006(3) -0.026(3) 0.034(3) 
 
_geom_special_details 
; 
 All esds (except the esd in the dihedral angle between two l.s. planes) 
 are estimated using the full covariance matrix.  The cell esds are taken 
 into account individually in the estimation of esds in distances, angles 
 and torsion angles; correlations between esds in cell parameters are only 
 used when they are defined by crystal symmetry.  An approximate (isotropic) 
 treatment of cell esds is used for estimating esds involving l.s. planes. 
; 
 
loop_ 
 _geom_bond_atom_site_label_1 
 _geom_bond_atom_site_label_2 
 _geom_bond_distance 
 _geom_bond_site_symmetry_2 
 _geom_bond_publ_flag 
N1 C5 1.329(9) . ? 
N1 C1 1.329(9) . ? 
N1 H1N 1.2584 . ? 
N2 C10 1.332(10) . ? 
N2 C6 1.338(10) . ? 
N2 H1N 1.3934 . ? 
B1 C19 1.634(8) . ? 
B1 C35 1.638(8) . ? 
B1 C11 1.641(8) . ? 
B1 C27 1.645(8) . ? 
C1 C2 1.374(10) . ? 
C1 H1A 0.9300 . ? 
C2 C3 1.366(11) . ? 
C2 H2A 0.9300 . ? 
C3 C4 1.345(11) . ? 
C3 H3A 0.9300 . ? 
C4 C5 1.366(10) . ? 
C4 H4A 0.9300 . ? 
C5 H5A 0.9300 . ? 
C6 C7 1.367(10) . ? 
C6 H6B 0.9300 . ? 
C7 C8 1.378(11) . ? 
C7 H7B 0.9300 . ? 
C8 C9 1.328(12) . ? 
C8 H8A 0.9300 . ? 
C9 C10 1.367(11) . ? 
C9 H9A 0.9300 . ? 
C10 H10B 0.9300 . ? 
C11 C16 1.397(7) . ? 
C11 C12 1.407(7) . ? 
C12 C13 1.392(7) . ? 
C12 H12A 0.9300 . ? 
C13 C14 1.385(8) . ? 
C13 C17 1.551(6) . ? 
C14 C15 1.375(8) . ? 
C14 H14A 0.9300 . ? 
C15 C16 1.401(7) . ? 
C15 C18 1.478(8) . ? 
C16 H16A 0.9300 . ? 
C18 F6 1.301(7) . ? 
C18 F5 1.335(8) . ? 
C18 F4 1.342(8) . ? 
C19 C20 1.403(7) . ? 
C19 C24 1.403(7) . ? 
C20 C21 1.390(8) . ? 
C20 H20A 0.9300 . ? 
C21 C22 1.382(8) . ? 
C21 C25 1.553(6) . ? 
C22 C23 1.383(8) . ? 
C22 H22A 0.9300 . ? 
C23 C24 1.390(8) . ? 
C23 C26 1.561(6) . ? 
C24 H24A 0.9300 . ? 
C27 C32 1.375(7) . ? 
C27 C28 1.415(8) . ? 
C28 C29 1.393(8) . ? 
C28 H28A 0.9300 . ? 
C29 C30 1.384(8) . ? 
C29 C33 1.567(6) . ? 
C30 C31 1.376(8) . ? 
C30 H30A 0.9300 . ? 
C31 C32 1.396(8) . ? 
C31 C34 1.561(6) . ? 
C32 H32A 0.9300 . ? 
C35 C36 1.398(7) . ? 
C35 C40 1.401(7) . ? 
C36 C37 1.388(8) . ? 
C36 H36A 0.9300 . ? 
C38 C37 1.383(8) . ? 
C38 C39 1.391(8) . ? 
C38 H38A 0.9300 . ? 
C37 C41 1.568(6) . ? 
C39 C40 1.379(8) . ? 
C39 C42 1.560(6) . ? 
C40 H40A 0.9300 . ? 
C41 F21' 1.3200 . ? 
 
loop_ 
 _geom_angle_atom_site_label_1 
 _geom_angle_atom_site_label_2 
 _geom_angle_atom_site_label_3 
 _geom_angle 
 _geom_angle_site_symmetry_1 
 _geom_angle_site_symmetry_3 
 _geom_angle_publ_flag 
C5 N1 C1 121.2(6) . . ? 
C5 N1 H1N 114.8 . . ? 
C1 N1 H1N 124.0 . . ? 
C10 N2 C6 118.9(7) . . ? 
C10 N2 H1N 117.9 . . ? 
C6 N2 H1N 122.9 . . ? 
C19 B1 C35 104.2(4) . . ? 
C19 B1 C11 112.7(4) . . ? 
C35 B1 C11 112.9(4) . . ? 
C19 B1 C27 112.7(4) . . ? 
C35 B1 C27 112.2(4) . . ? 
C11 B1 C27 102.5(4) . . ? 
N1 C1 C2 119.8(7) . . ? 
N1 C1 H1A 120.1 . . ? 
C2 C1 H1A 120.1 . . ? 
C3 C2 C1 118.8(7) . . ? 
C3 C2 H2A 120.6 . . ? 
C1 C2 H2A 120.6 . . ? 
C4 C3 C2 120.6(7) . . ? 
C4 C3 H3A 119.7 . . ? 
C2 C3 H3A 119.7 . . ? 
C3 C4 C5 118.9(8) . . ? 
C3 C4 H4A 120.6 . . ? 
C5 C4 H4A 120.6 . . ? 
N1 C5 C4 120.6(7) . . ? 
N1 C5 H5A 119.7 . . ? 
C4 C5 H5A 119.7 . . ? 
N2 C6 C7 121.5(8) . . ? 
N2 C6 H6B 119.2 . . ? 
C7 C6 H6B 119.2 . . ? 
C6 C7 C8 118.7(9) . . ? 
C6 C7 H7B 120.7 . . ? 
C8 C7 H7B 120.7 . . ? 
C9 C8 C7 119.3(8) . . ? 
C9 C8 H8A 120.3 . . ? 
C7 C8 H8A 120.3 . . ? 
C8 C9 C10 120.5(9) . . ? 
C8 C9 H9A 119.7 . . ? 
C10 C9 H9A 119.7 . . ? 
N2 C10 C9 121.0(9) . . ? 
N2 C10 H10B 119.5 . . ? 
C9 C10 H10B 119.5 . . ? 
C16 C11 C12 115.1(5) . . ? 
C16 C11 B1 122.8(5) . . ? 
C12 C11 B1 121.4(5) . . ? 
C13 C12 C11 122.6(5) . . ? 
C13 C12 H12A 118.7 . . ? 
C11 C12 H12A 118.7 . . ? 
C14 C13 C12 120.4(5) . . ? 
C14 C13 C17 120.3(5) . . ? 
C12 C13 C17 119.3(5) . . ? 
C15 C14 C13 118.9(5) . . ? 
C15 C14 H14A 120.5 . . ? 
C13 C14 H14A 120.5 . . ? 
C14 C15 C16 120.2(5) . . ? 
C14 C15 C18 120.2(5) . . ? 
C16 C15 C18 119.6(5) . . ? 
C11 C16 C15 122.8(5) . . ? 
C11 C16 H16A 118.6 . . ? 
C15 C16 H16A 118.6 . . ? 
F6 C18 F5 105.9(6) . . ? 
F6 C18 F4 106.3(6) . . ? 
F5 C18 F4 102.8(6) . . ? 
F6 C18 C15 115.2(6) . . ? 
F5 C18 C15 113.3(6) . . ? 
F4 C18 C15 112.4(6) . . ? 
C20 C19 C24 115.2(5) . . ? 
C20 C19 B1 121.4(5) . . ? 
C24 C19 B1 123.0(5) . . ? 
C21 C20 C19 122.7(5) . . ? 
C21 C20 H20A 118.6 . . ? 
C19 C20 H20A 118.6 . . ? 
C22 C21 C20 120.2(5) . . ? 
C22 C21 C25 120.3(5) . . ? 
C20 C21 C25 119.5(5) . . ? 
C21 C22 C23 119.0(5) . . ? 
C21 C22 H22A 120.5 . . ? 
C23 C22 H22A 120.5 . . ? 
C22 C23 C24 120.2(5) . . ? 
C22 C23 C26 120.0(5) . . ? 
C24 C23 C26 119.8(5) . . ? 
C23 C24 C19 122.7(5) . . ? 
C23 C24 H24A 118.7 . . ? 
C19 C24 H24A 118.7 . . ? 
C32 C27 C28 115.6(5) . . ? 
C32 C27 B1 124.3(5) . . ? 
C28 C27 B1 119.7(5) . . ? 
C29 C28 C27 121.5(5) . . ? 
C29 C28 H28A 119.3 . . ? 
C27 C28 H28A 119.3 . . ? 
C30 C29 C28 120.8(6) . . ? 
C30 C29 C33 120.8(5) . . ? 
C28 C29 C33 118.4(5) . . ? 
C31 C30 C29 118.8(6) . . ? 
C31 C30 H30A 120.6 . . ? 
C29 C30 H30A 120.6 . . ? 
C30 C31 C32 119.9(6) . . ? 
C30 C31 C34 120.1(5) . . ? 
C32 C31 C34 120.0(5) . . ? 
C27 C32 C31 123.5(5) . . ? 
C27 C32 H32A 118.3 . . ? 
C31 C32 H32A 118.3 . . ? 
C36 C35 C40 115.3(5) . . ? 
C36 C35 B1 122.5(5) . . ? 
C40 C35 B1 122.1(5) . . ? 
C37 C36 C35 122.4(5) . . ? 
C37 C36 H36A 118.8 . . ? 
C35 C36 H36A 118.8 . . ? 
C37 C38 C39 118.4(5) . . ? 
C37 C38 H38A 120.8 . . ? 
C39 C38 H38A 120.8 . . ? 
C38 C37 C36 120.6(5) . . ? 
C38 C37 C41 120.1(5) . . ? 
C36 C37 C41 119.3(5) . . ? 
C40 C39 C38 120.2(5) . . ? 
C40 C39 C42 119.4(5) . . ? 
C38 C39 C42 120.5(5) . . ? 
C39 C40 C35 123.0(5) . . ? 
C39 C40 H40A 118.5 . . ? 
C35 C40 H40A 118.5 . . ? 
F21' C41 C37 109.5(2) . . ? 
 
loop_ 
 _geom_torsion_atom_site_label_1 
 _geom_torsion_atom_site_label_2 
 _geom_torsion_atom_site_label_3 
 _geom_torsion_atom_site_label_4 
 _geom_torsion 
 _geom_torsion_site_symmetry_1 
 _geom_torsion_site_symmetry_2 
 _geom_torsion_site_symmetry_3 
 _geom_torsion_site_symmetry_4 
 _geom_torsion_publ_flag 
C5 N1 C1 C2 0.6(11) . . . . ? 
N1 C1 C2 C3 -1.2(12) . . . . ? 
C1 C2 C3 C4 1.7(13) . . . . ? 
C2 C3 C4 C5 -1.5(12) . . . . ? 
C1 N1 C5 C4 -0.4(11) . . . . ? 
C3 C4 C5 N1 0.9(12) . . . . ? 
C10 N2 C6 C7 1.2(12) . . . . ? 
N2 C6 C7 C8 -0.8(13) . . . . ? 
C6 C7 C8 C9 0.2(13) . . . . ? 
C7 C8 C9 C10 0.0(14) . . . . ? 
C6 N2 C10 C9 -1.0(12) . . . . ? 
C8 C9 C10 N2 0.4(14) . . . . ? 
C19 B1 C11 C16 36.7(7) . . . . ? 
C35 B1 C11 C16 154.4(5) . . . . ? 
C27 B1 C11 C16 -84.7(6) . . . . ? 
C19 B1 C11 C12 -152.7(5) . . . . ? 
C35 B1 C11 C12 -35.0(7) . . . . ? 
C27 B1 C11 C12 85.9(6) . . . . ? 
C16 C11 C12 C13 0.6(8) . . . . ? 
B1 C11 C12 C13 -170.7(5) . . . . ? 
C11 C12 C13 C14 -0.7(9) . . . . ? 
C11 C12 C13 C17 178.1(5) . . . . ? 
C12 C13 C14 C15 0.3(9) . . . . ? 
C17 C13 C14 C15 -178.5(5) . . . . ? 
C13 C14 C15 C16 0.1(9) . . . . ? 
C13 C14 C15 C18 179.0(6) . . . . ? 
C12 C11 C16 C15 -0.1(8) . . . . ? 
B1 C11 C16 C15 171.0(5) . . . . ? 
C14 C15 C16 C11 -0.2(8) . . . . ? 
C18 C15 C16 C11 -179.1(6) . . . . ? 
C14 C15 C18 F6 5.1(10) . . . . ? 
C16 C15 C18 F6 -176.0(6) . . . . ? 
C14 C15 C18 F5 127.2(6) . . . . ? 
C16 C15 C18 F5 -53.9(8) . . . . ? 
C14 C15 C18 F4 -116.8(7) . . . . ? 
C16 C15 C18 F4 62.1(8) . . . . ? 
C35 B1 C19 C20 -85.6(6) . . . . ? 
C11 B1 C19 C20 37.1(7) . . . . ? 
C27 B1 C19 C20 152.5(5) . . . . ? 
C35 B1 C19 C24 86.6(6) . . . . ? 
C11 B1 C19 C24 -150.6(5) . . . . ? 
C27 B1 C19 C24 -35.2(7) . . . . ? 
C24 C19 C20 C21 1.0(8) . . . . ? 
B1 C19 C20 C21 173.8(5) . . . . ? 
C19 C20 C21 C22 1.2(8) . . . . ? 
C19 C20 C21 C25 -179.6(5) . . . . ? 
C20 C21 C22 C23 -1.9(8) . . . . ? 
C25 C21 C22 C23 178.8(5) . . . . ? 
C21 C22 C23 C24 0.5(8) . . . . ? 
C21 C22 C23 C26 179.4(5) . . . . ? 
C22 C23 C24 C19 1.8(8) . . . . ? 
C26 C23 C24 C19 -177.1(5) . . . . ? 
C20 C19 C24 C23 -2.5(8) . . . . ? 
B1 C19 C24 C23 -175.2(5) . . . . ? 
C19 B1 C27 C32 -29.2(7) . . . . ? 
C35 B1 C27 C32 -146.4(5) . . . . ? 
C11 B1 C27 C32 92.2(6) . . . . ? 
C19 B1 C27 C28 158.5(5) . . . . ? 
C35 B1 C27 C28 41.3(7) . . . . ? 
C11 B1 C27 C28 -80.1(6) . . . . ? 
C32 C27 C28 C29 2.3(8) . . . . ? 
B1 C27 C28 C29 175.2(5) . . . . ? 
C27 C28 C29 C30 -0.5(10) . . . . ? 
C27 C28 C29 C33 179.9(5) . . . . ? 
C28 C29 C30 C31 -1.0(10) . . . . ? 
C33 C29 C30 C31 178.6(6) . . . . ? 
C29 C30 C31 C32 0.7(10) . . . . ? 
C29 C30 C31 C34 -179.1(6) . . . . ? 
C28 C27 C32 C31 -2.7(9) . . . . ? 
B1 C27 C32 C31 -175.2(5) . . . . ? 
C30 C31 C32 C27 1.2(10) . . . . ? 
C34 C31 C32 C27 -179.0(5) . . . . ? 
C19 B1 C35 C36 83.5(6) . . . . ? 
C11 B1 C35 C36 -39.1(7) . . . . ? 
C27 B1 C35 C36 -154.3(5) . . . . ? 
C19 B1 C35 C40 -92.4(6) . . . . ? 
C11 B1 C35 C40 145.0(5) . . . . ? 
C27 B1 C35 C40 29.8(7) . . . . ? 
C40 C35 C36 C37 0.2(8) . . . . ? 
B1 C35 C36 C37 -175.9(5) . . . . ? 
C39 C38 C37 C36 1.0(9) . . . . ? 
C39 C38 C37 C41 -179.3(5) . . . . ? 
C35 C36 C37 C38 -0.7(9) . . . . ? 
C35 C36 C37 C41 179.5(5) . . . . ? 
C37 C38 C39 C40 -0.7(9) . . . . ? 
C37 C38 C39 C42 179.4(5) . . . . ? 
C38 C39 C40 C35 0.3(9) . . . . ? 
C42 C39 C40 C35 -179.9(5) . . . . ? 
C36 C35 C40 C39 0.0(9) . . . . ? 
B1 C35 C40 C39 176.2(5) . . . . ? 
C38 C37 C41 F21' 160.6(4) . . . . ? 
C36 C37 C41 F21' -19.6(5) . . . . ? 
 
loop_                                                                           
 _geom_hbond_atom_site_label_D                                                  
 _geom_hbond_atom_site_label_H                                                  
 _geom_hbond_atom_site_label_A                                                  
 _geom_hbond_site_symmetry_A                                                    
 _geom_hbond_distance_DH                                                        
 _geom_hbond_distance_HA                                                        
 _geom_hbond_distance_DA                                                        
 _geom_hbond_angle_DHA                                                          
 _geom_hbond_publ_flag                                                        
 N1   H1N   N2  1_555  1.26       1.39       2.646(8)        173 ? 
                   

_diffrn_measured_fraction_theta_max    0.998 
_diffrn_reflns_theta_full              28.00 
_diffrn_measured_fraction_theta_full   0.998 
_refine_diff_density_max    0.963 
_refine_diff_density_min   -1.149 
_refine_diff_density_rms    0.105 

_publ_section_references 

; 
Bruker (2005). APEX2 softwarwe package, Bruker AXS Inc., 5465, 
East Cheryl Parkway, Madison, WI 5317. 

Sheldrick G.M. (1998). SHELXTL v. 5.10, Structure Determination Software 
Suite, Bruker AXS, Madison, Wisconsin, USA. 
;

_publ_section_exptl_refinement

;                                                                         
The hydrogen atom of NH group was found in difference
Fourier synthesis. The H(C) atom positions were calculated. All hydrogen
atoms were refined in isotropic approximation in riding model with with the
Uiso(H) parameters equal to 1.2 Ueq(Ci), for methyl groups equal to 1.5
Ueq(Cii), where U(Ci) and U(Cii) are respectively the equivalent thermal
parameters of the carbon atoms to which corresponding H atoms are bonded.
;
